# Supplementary material for: Drivers of Three Most Charismatic Mammalian Species Distribution across a Multiple-Use Tropical Forest Landscape of Sumatra, Indonesia
Source: MDPI journal article supplement (doi:10.3390/ani12192722), 2022-10-10
Supplement: s1 [file s1]

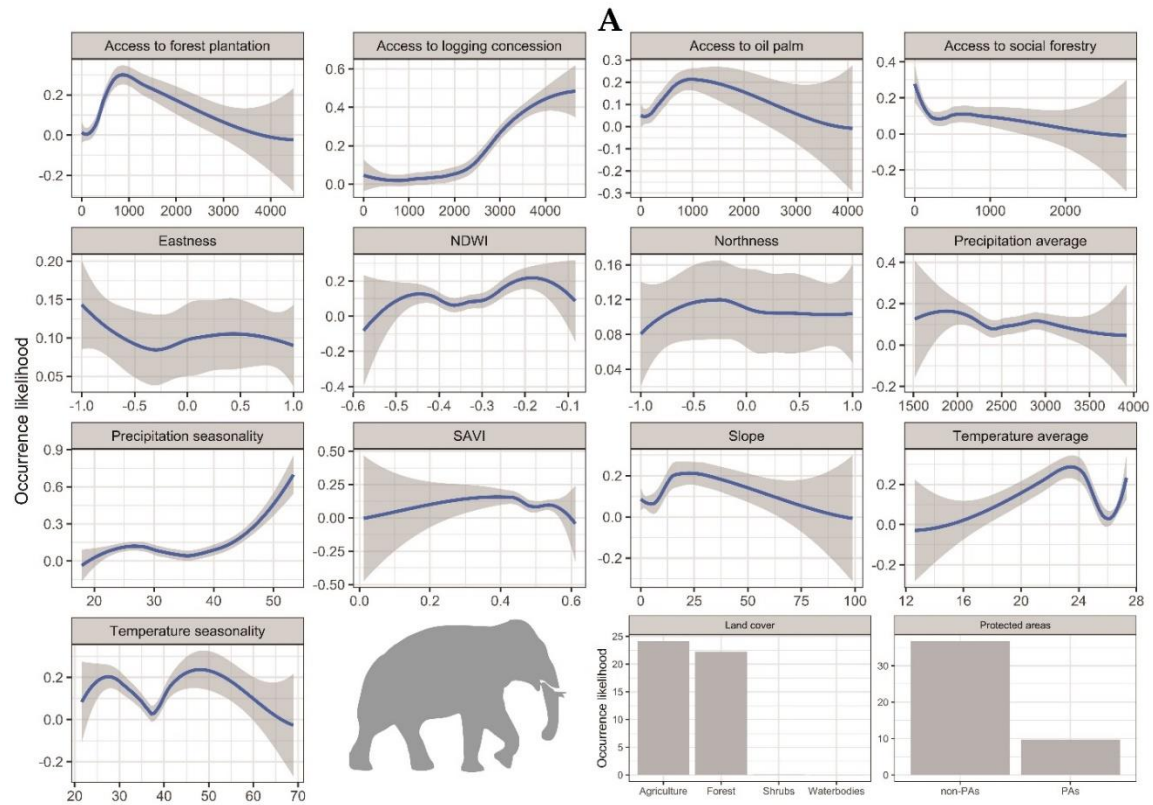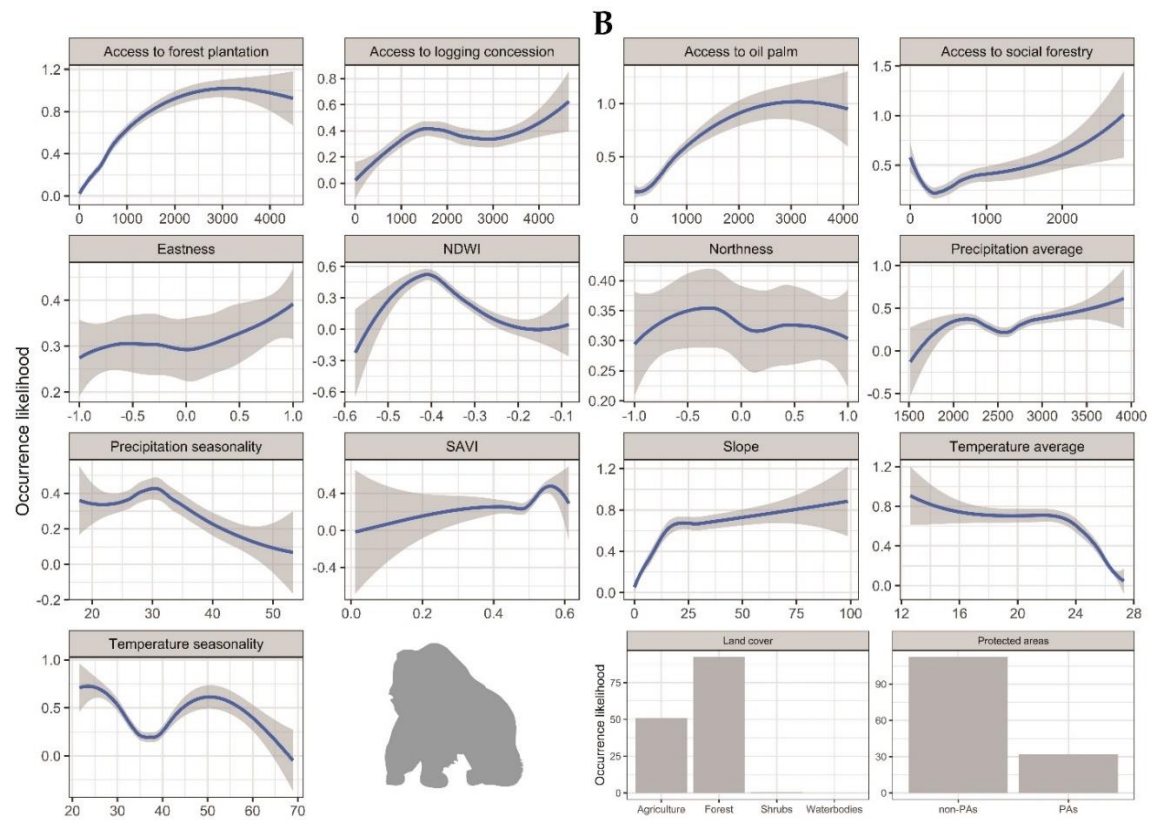

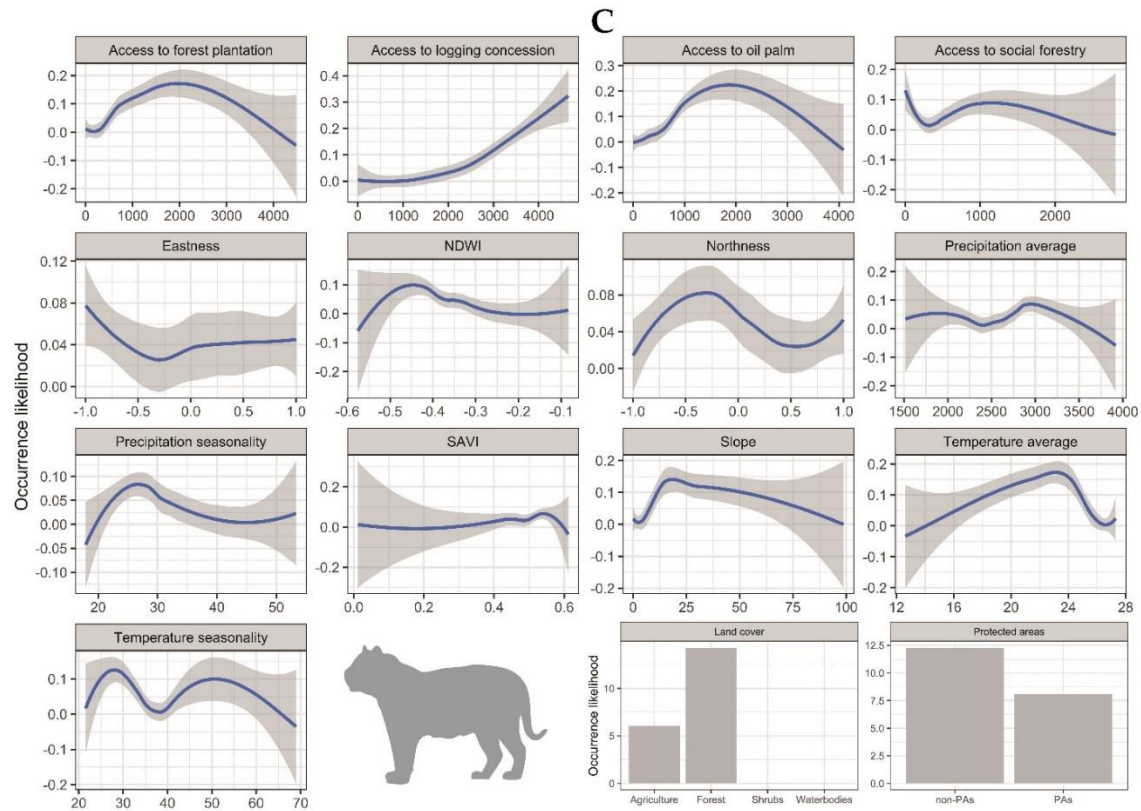

**Figure S1.** Response curves for each environmental layers of the best algorithm of *Elephas maximus sumatranus* (A), *Pongo abelii* (B), and *Panthera tigris sumatrae* (C).

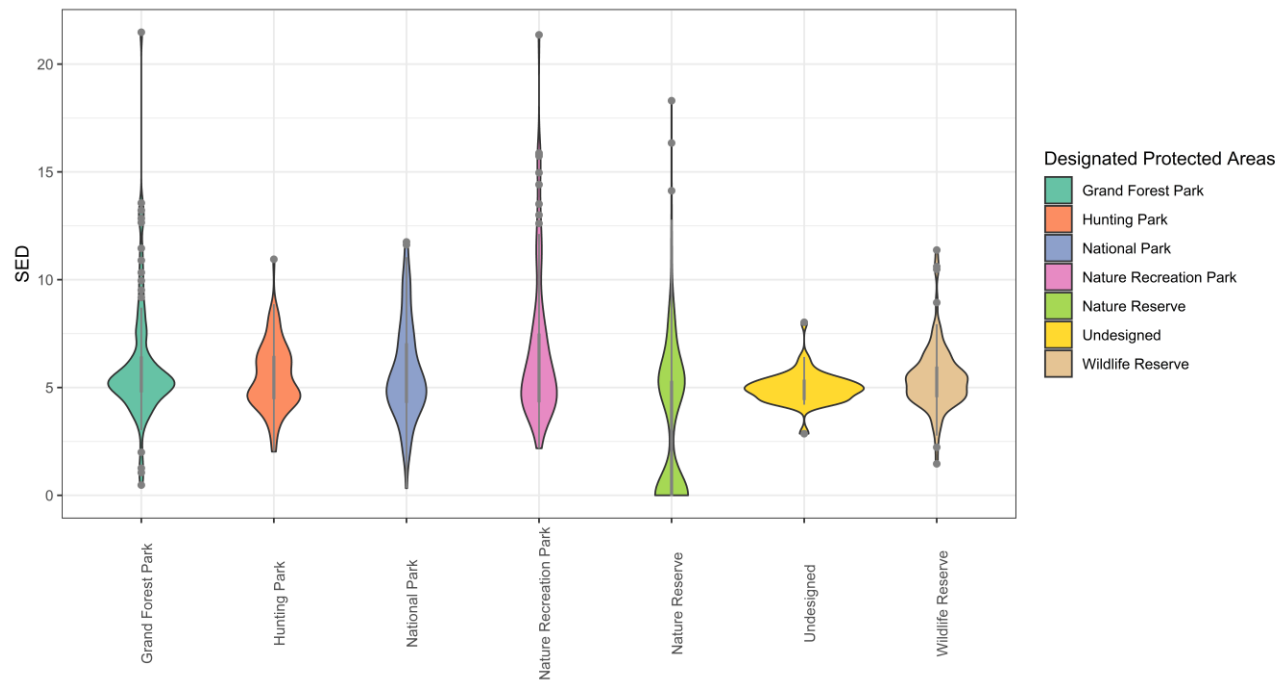

**Figure S2.** Climatic responses to the protected areas status.

**Table S1.** Description of 20 environmental variables that influence *Elephas maximus sumatranus*, *Pongo abelii*, and *Panthera tigris sumatrae* in Sumatran Island.

| Group         | Variables                                     | Sources                                 |
|---------------|-----------------------------------------------|-----------------------------------------|
| Topographic   | Slope                                         | SRTM (Farr et al., 2007)                |
|               | Elevation                                     | SRTM (Farr et al., 2007)                |
|               | Eastness                                      | SRTM (Farr et al., 2007)                |
|               | Northness                                     | SRTM (Farr et al., 2007)                |
|               | Aspect                                        | SRTM (Farr et al., 2007)                |
| Biophysics    | Enhanced Vegetation Index (EVI)               | Landsat 8 (Huete et al., 2002)          |
|               | Normalized Difference Vegetation Index (NDVI) | Landsat 8 (Huete et al., 2002)          |
|               | Normalized Difference Wetness Index (NDWI)    | Landsat 8 (Gao, 1996)                   |
|               | Index-based Built-up Index (IBI)              | Landsat 8 (Xu, 2008)                    |
|               | Soil-Adjusted Vegetation Index (SAVI)         | Landsat 8 (Huete, 1988)                 |
|               | Protected areas                               | MoEF                                    |
| Anthropogenic | Land cover                                    | CCI-ESA (Li et al., 2018)               |
|               | Access to oil palm plantation                 | WRI                                     |
|               | Access to logging concession                  | MoEF                                    |
|               | Access to industrial plantation concession    | MoEF                                    |
|               | Access to social forestry concession          | MoEF                                    |
| Climatic      | Mean annual temperature                       | WorldClim v2.0 (Fick and Hijmans, 2017) |
|               | Temperature seasonality                       | WorldClim v2.0 (Fick and Hijmans, 2017) |
|               | Mean annual precipitation                     | WorldClim v2.0 (Fick and Hijmans, 2017) |
|               | Precipitation seasonality                     | WorldClim v2.0 (Fick and Hijmans, 2017) |

**Table S2.** Predictive performance of the models on the k-fold (k = 5) for each species using five different metrics of accuracy, show in mean of value  $\pm$  SE – i.e., Area Under the ROC Curve (AUC), Kappa coefficient, True Skill Statistic (TSS), Jaccard Index, and Sørensen Index.

| Species                           | Algorithm | AUC              | Kappa            | TSS              | Jaccard          | Sørensen         |
|-----------------------------------|-----------|------------------|------------------|------------------|------------------|------------------|
| <i>Elephas maximus sumatranus</i> | BRT       | 0.85 $\pm$ 0.016 | 0.55 $\pm$ 0.035 | 0.55 $\pm$ 0.035 | 0.65 $\pm$ 0.028 | 0.79 $\pm$ 0.021 |
|                                   | MXD       | 0.81 $\pm$ 0.015 | 0.48 $\pm$ 0.050 | 0.48 $\pm$ 0.050 | 0.60 $\pm$ 0.014 | 0.75 $\pm$ 0.011 |
|                                   | RDF       | 0.88 $\pm$ 0.009 | 0.60 $\pm$ 0.032 | 0.60 $\pm$ 0.032 | 0.70 $\pm$ 0.020 | 0.82 $\pm$ 0.014 |
|                                   | SVM       | 0.80 $\pm$ 0.021 | 0.46 $\pm$ 0.050 | 0.46 $\pm$ 0.050 | 0.60 $\pm$ 0.024 | 0.75 $\pm$ 0.018 |
|                                   | ENS       | 0.88 $\pm$ 0.010 | 0.59 $\pm$ 0.037 | 0.59 $\pm$ 0.037 | 0.68 $\pm$ 0.015 | 0.81 $\pm$ 0.011 |
| <i>Pongo abelii</i>               | BRT       | 0.96 $\pm$ 0.005 | 0.84 $\pm$ 0.019 | 0.84 $\pm$ 0.019 | 0.86 $\pm$ 0.016 | 0.92 $\pm$ 0.009 |
|                                   | MXD       | 0.95 $\pm$ 0.007 | 0.85 $\pm$ 0.015 | 0.85 $\pm$ 0.015 | 0.87 $\pm$ 0.014 | 0.93 $\pm$ 0.008 |
|                                   | RDF       | 0.97 $\pm$ 0.004 | 0.86 $\pm$ 0.011 | 0.86 $\pm$ 0.011 | 0.87 $\pm$ 0.008 | 0.93 $\pm$ 0.004 |
|                                   | SVM       | 0.95 $\pm$ 0.009 | 0.81 $\pm$ 0.020 | 0.81 $\pm$ 0.020 | 0.84 $\pm$ 0.016 | 0.91 $\pm$ 0.010 |
|                                   | ENS       | 0.96 $\pm$ 0.007 | 0.86 $\pm$ 0.016 | 0.86 $\pm$ 0.016 | 0.88 $\pm$ 0.014 | 0.93 $\pm$ 0.008 |
| <i>Panthera tigris sumatrae</i>   | BRT       | 0.89 $\pm$ 0.022 | 0.64 $\pm$ 0.031 | 0.64 $\pm$ 0.031 | 0.72 $\pm$ 0.018 | 0.84 $\pm$ 0.012 |
|                                   | MXD       | 0.88 $\pm$ 0.021 | 0.62 $\pm$ 0.060 | 0.62 $\pm$ 0.060 | 0.71 $\pm$ 0.031 | 0.83 $\pm$ 0.021 |
|                                   | RDF       | 0.89 $\pm$ 0.019 | 0.65 $\pm$ 0.032 | 0.65 $\pm$ 0.032 | 0.73 $\pm$ 0.023 | 0.84 $\pm$ 0.015 |
|                                   | SVM       | 0.88 $\pm$ 0.021 | 0.66 $\pm$ 0.046 | 0.56 $\pm$ 0.046 | 0.73 $\pm$ 0.027 | 0.84 $\pm$ 0.017 |
|                                   | ENS       | 0.90 $\pm$ 0.020 | 0.67 $\pm$ 0.051 | 0.67 $\pm$ 0.051 | 0.74 $\pm$ 0.032 | 0.85 $\pm$ 0.021 |

**Table S3.** List of predicted suitable landscapes and land use characteristics with species record in protected and non-protected areas landscape for *Elephas maximus sumatranus*, *Pongo abelii*, and *Panthera tigris sumatrae*.

| Land cover types | Protected areas (ha)              |                     |                                 | Non-protected areas (ha)          |                     |                                 |
|------------------|-----------------------------------|---------------------|---------------------------------|-----------------------------------|---------------------|---------------------------------|
|                  | <i>Elephas maximus sumatranus</i> | <i>Pongo abelii</i> | <i>Panthera tigris sumatrae</i> | <i>Elephas maximus sumatranus</i> | <i>Pongo abelii</i> | <i>Panthera tigris sumatrae</i> |
| Agriculture      | 263,932.41                        | 15,023.54           | 254,502.44                      | 251,1338.80                       | 97,922.73           | 208,159.18                      |
| Forest           | 737,755.48                        | 714,576.74          | 3,417,720.73                    | 2,200,906.99                      | 1,813,047.52        | 4,111,219.92                    |
| Shrubs           | 3059.93                           | 57.38               | 3149.95                         | 34,727.81                         | 1237.68             | 7650.52                         |
| Urban areas      | 185.46                            | 0                   | 156.55                          | 1309.66                           | 0                   | 111.76                          |
| Waterbodies      | 310.70                            | 115.86              | 976.67                          | 21,823.15                         | 604.24              | 1892.85                         |

**Table S4.** List of predicted suitable landscapes for three charismatic species record in protected area landscape of Sumatran Island.

| Province                          | Protected area                     | Designation            | Size of area (ha) |
|-----------------------------------|------------------------------------|------------------------|-------------------|
| <i>Elephas maximus sumatranus</i> |                                    |                        |                   |
| Nanggroe Aceh Darussalam          | Gunung Leuser                      | National Park          | 62,003.06         |
|                                   | Hutan Pinus/ Janthoi               | Nature Reserve         | 6570.98           |
|                                   | Janthoi                            | Nature Recreation Park | 241.71            |
|                                   | Lingga Isaq                        | Hunting Park           | 23,969.01         |
|                                   | Pocut Meurah Intan                 | Grand Forest Park      | 1640.99           |
|                                   | Raflessia I/II Serbojadi           | Nature Reserve         | 300.46            |
| North Sumatra                     | Gunung Leuser                      | National Park          | 25,308.61         |
| Riau                              | Balai Raja                         | Wildlife Reserve       | 2230.29           |
|                                   | Bukit Bungkok                      | Nature Reserve         | 380.34            |
|                                   | Bukit Tiga Puluh                   | National Park          | 41,949.84         |
|                                   | Giam Siak Kecil                    | Wildlife Reserve       | 2757.54           |
|                                   | PLG Sebang                         | Wildlife Reserve       | 1657.15           |
|                                   | Sultan Syarif Kasim (Minas)        | Grand Forest Park      | 2005.89           |
|                                   | Tesso Nilo                         | National Park          | 57,620.55         |
| Jambi                             | Bukit Tiga Puluh                   | National Park          | 7517.30           |
|                                   | Buluh Hitam                        | Undesigned             | 456.03            |
|                                   | Kerinci Seblat                     | National Park          | 32,890.91         |
|                                   | Sekitar Tanjung (Orang Kayo Hitam) | Grand Forest Park      | 158.78            |
| Bengkulu                          | Bukit Barisan Selatan              | National Park          | 52,202.80         |
|                                   | Kerinci Seblat                     | National Park          | 106,343.22        |
|                                   | Seblat                             | Nature Recreation Park | 4306.84           |
|                                   | Way Hawang                         | Nature Recreation Park | 15.00             |
| South Sumatra                     | Bentayan                           | Wildlife Reserve       | 12,404.50         |
|                                   | Bukit Barisan Selatan              | National Park          | 13.43             |
|                                   | Dangku                             | Wildlife Reserve       | 13,195.77         |
|                                   | Gunung Raya                        | Wildlife Reserve       | 27,996.59         |

|                                 |                          |                        |            |
|---------------------------------|--------------------------|------------------------|------------|
|                                 | Kerinci Seblat           | National Park          | 67,339.77  |
|                                 | Padang Sugihan           | Wildlife Reserve       | 62,145.31  |
| Lampung                         | Bukit Barisan Selatan    | National Park          | 238,996.04 |
|                                 | Gunung Raya              | Wildlife Reserve       | 2265.55    |
|                                 | Rawa Kandis              | Undesigned             | 1058.19    |
|                                 | Wan Abdul Rahman         | Grand Forest Park      | 20,493.12  |
|                                 | Way Kambas               | National Park          | 126,808.41 |
| <i>Pongo abelii</i>             |                          |                        |            |
| Nanggroe Aceh Darussalam        | Gunung Leuser            | National Park          | 429,527.61 |
|                                 | Hutan Pinus/ Janthoi     | Nature Reserve         | 13,620.44  |
|                                 | Janthoi                  | Nature Recreation Park | 1004.44    |
|                                 | Kuta Malaka              | Nature Recreation Park | 66.04      |
|                                 | Lingga Isaq              | Hunting Park           | 57,493.44  |
|                                 | Pocut Meurah Intan       | Grand Forest Park      | 4299.94    |
|                                 | Raflessia I/II Serbojadi | Nature Reserve         | 308.86     |
|                                 | Rawa Singkil             | Wildlife Reserve       | 78,421.02  |
| North Sumatra                   | Gunung Leuser            | National Park          | 141,694.32 |
|                                 | Siranggas                | Wildlife Reserve       | 3337.40    |
| <i>Panthera tigris sumatrae</i> |                          |                        |            |
| Nanggroe Aceh Darussalam        | Gunung Leuser            | National Park          | 564,580.59 |
|                                 | Hutan Pinus/ Janthoi     | Nature Reserve         | 15,651.48  |
|                                 | Lingga Isaq              | Hunting Park           | 36,416.16  |
|                                 | Rawa Singkil             | Wildlife Reserve       | 1505.50    |
|                                 | Subulussalam             | Grand Forest Park      | 1016.36    |
|                                 | Pocut Meurah Intan       | Grand Forest Park      | 4203.83    |
|                                 | Serbojadi                | Nature Reserve         | 34.98      |
| North Sumatra                   | Barumon                  | Wildlife Reserve       | 37,428.98  |
|                                 | Batang Gadis             | National Park          | 59,717.55  |
|                                 | Bukit Barisan            | Grand Forest Park      | 26,792.69  |
|                                 | Dolok Saut               | Nature Reserve         | 126.74     |
|                                 | Dolok Sibual-Buali       | Nature Reserve         | 4023.54    |
|                                 | Dolok Sipirok            | Nature Reserve         | 7006.49    |
|                                 | Dolok Surungan           | Wildlife Reserve       | 15,193.31  |
|                                 | Dolok Tinggi Raja        | Nature Reserve         | 129.97     |
|                                 | Gunung Leuser            | Grand Forest Park      | 176,764.46 |
|                                 | Karang Gading Timur Laut | Nature Reserve         | 654.76     |
|                                 | Lau Debuk Debuk          | Nature Reserve         | 2.89       |
|                                 | Lubuk Raya               | Nature Reserve         | 1806.39    |
|                                 | Sibolangit               | Nature Reserve         | 25.86      |
|                                 | Sicikeh-Cikeh            | Nature Reserve         | 470.39     |
|                                 | Siranggas                | Wildlife Reserve       | 5422.98    |

|              |                                  |                        |            |
|--------------|----------------------------------|------------------------|------------|
| West Sumatra | Air Putih                        | Nature Recreation Park | 7526.46    |
|              | Arau Hilir dan Air Terusan       | Wildlife Reserve       | 87,040.00  |
|              | Batang Gadis                     | National Park          | 96.71      |
|              | Batang Pangean I                 | Nature Reserve         | 12,358.96  |
|              | Batang Pangean II                | Nature Reserve         | 29,229.92  |
|              | Bukit Rimbang Bukit Baling       | Wildlife Reserve       | 1676.24    |
|              | Gunung Marapi                    | Nature Recreation Park | 5842.76    |
|              | Gunung Sago Malintang            | Nature Recreation Park | 3797.51    |
|              | Kerinci Seblat                   | National Park          | 287,119.31 |
|              | Lembah Anai                      | Nature Reserve         | 305.74     |
|              | Lembah Harau                     | Nature Recreation Park | 125.17     |
|              | Malampah Alahan Panjang          | Wildlife Reserve       | 36,840.11  |
|              | Maninjau                         | Nature Reserve         | 17,465.82  |
|              | Mega Mendung                     | Nature Recreation Park | 4.15       |
|              | Rimbo Panti                      | Nature Recreation Park | 2876.25    |
|              | Singgalang Tandikat              | Nature Recreation Park | 6806.69    |
| Riau         | Air Putih                        | Nature Recreation Park | 682.92     |
|              | Balai Raja                       | Wildlife Reserve       | 397.41     |
|              | Bukit Batu                       | Wildlife Reserve       | 20,327.38  |
|              | Bukit Bungkok                    | Nature Reserve         | 11,469.09  |
|              | Bukit Rimbang Bukit Baling       | Wildlife Reserve       | 132,001.38 |
|              | Bukit Tiga Puluh                 | National Park          | 101,807.68 |
|              | Buluh Cina                       | Nature Recreation Park | 28,354.49  |
|              | Giam Siak Kecil                  | Nature Reserve         | 52,693.55  |
|              | Kerumutan                        | Wildlife Reserve       | 91,604.88  |
|              | Mahato                           | Nature Reserve         | 821.69     |
|              | Pulau Berkeh                     | Nature Reserve         | 4116.68    |
|              | Sultan Syarif Kasim/ Minas       | Grand Forest Park      | 496.69     |
|              | Tasik Belat                      | Wildlife Reserve       | 1670.69    |
|              | Tasik Besar-Tasik Metas          | Wildlife Reserve       | 3911.54    |
|              | Tasik Serkap-Tasik Sarang Burung | Wildlife Reserve       | 7072.61    |
|              | Tesso Nilo                       | National Park          | 59,255.58  |
| Jambi        | Berbak                           | National Park          | 130,226.84 |
|              | Bukit Dua Belas                  | National Park          | 40,992.56  |
|              | Bukit Tiga Puluh                 | National Park          | 37,821.77  |
|              | Buluh Hitam                      | Nature Reserve         | 256.98     |
|              | Hutan Bakau Pantai Timur         | Nature Reserve         | 571.28     |
|              | Kerinci Seblat                   | National Park          | 375,138.91 |
|              | Sembilang                        | National Park          | 11,035.34  |
| Bengkulu     | Air Ketebat Danau Tes            | Nature Recreation Park | 1653.76    |
|              | Air Seblat                       | Nature Reserve         | 7334.53    |

|               |                             |                        |            |
|---------------|-----------------------------|------------------------|------------|
|               | Bukit Barisan Selatan       | National Park          | 63,367.40  |
|               | Bukit Kaba                  | Nature Recreation Park | 12,223.67  |
|               | Bukit Rabang - Gluguran     | Grand Forest Park      | 417.33     |
|               | Danau TES                   | Nature Recreation Park | 345.49     |
|               | Kerinci Seblat              | National Park          | 308,007.31 |
|               | Rajo Lelo (Pungguk Menakat) | Nature Recreation Park | 754.44     |
|               | Semidang Bukit Kabu         | Hunting Park           | 8634.06    |
|               | Way Hawang                  | Nature Recreation Park | 4.10       |
| South Sumatra | Bukit Barisan Selatan       | National Park          | 44.70      |
|               | Dangku                      | Wildlife Reserve       | 12,178.68  |
|               | Gumai Tebing Tinggi         | Wildlife Reserve       | 45,859.16  |
|               | Gunung Raya                 | Wildlife Reserve       | 22,009.71  |
|               | Isau-isau Pasemah           | Wildlife Reserve       | 15,904.70  |
|               | Kerinci Seblat              | National Park          | 218,501.18 |
|               | Sembilang                   | National Park          | 33,133.72  |
| Lampung       | Bukit Barisan Selatan       | National Park          | 249,685.30 |
|               | Gunung Raya                 | Wildlife Reserve       | 926.74     |
|               | Wan Abdul Rahman            | Grand Forest Park      | 14,694.98  |
|               | Way Kambas                  | National Park          | 90,009.79  |

**Table S5.** Geographical range of suitable landscape for *Elephas maximus sumatranus*, *Pongo abelii*, and *Panthera tigris sumatrae* in Sumatran Island in protected areas (PA), non-protected areas (non-PA), Forest plantation concession (FPC), Logging concessions (LC), Industrial oil palm plantation (IOPP), and Social Forestry Concession (SFC) (areas in ha).

| Province                                 | Total Area    | PA<br>(Total PA)               | Non-PA<br>(Total PA)            | FPC<br>(Total FPC)             | LC<br>(Total LC)           | IOPP<br>(Total IOPP)         | SFC<br>(Total SFC)         |
|------------------------------------------|---------------|--------------------------------|---------------------------------|--------------------------------|----------------------------|------------------------------|----------------------------|
| <b><i>Elephas maximus sumatranus</i></b> |               |                                |                                 |                                |                            |                              |                            |
| Nanggroe Aceh Darussalam                 | 5,688,779.18  | 94,726.20<br>(856,277.48)      | 1,177,963.75<br>(4,832,501.71)  | 109,896.78<br>(213,575.66)     | 109,675.27<br>(116,781.43) | 13,869.31<br>(292,826.25)    | 40,390.23<br>(110,772.61)  |
| North Sumatra                            | 7,198,584.10  | 25,308.61<br>(420,777.86)      | 125,715.22<br>(6,777,806.25)    | 79,111.77<br>(344,394.95)      | 0<br>(244,101.76)          | 923.14<br>(268,550.54)       | 12,248.62<br>(97,386.25)   |
| Riau                                     | 8,955,130.82  | 108,601.62<br>(626,126.24)     | 782,322.75<br>(8,329,004.58)    | 453,808.94<br>(1,555,333.45)   | 0<br>(134,502.14)          | 60,184.97<br>(2,209,216.02)  | 10,260.86<br>(55,311.98)   |
| Jambi                                    | 4,932,120.04  | 41,023.02<br>(731,159.01)      | 411,842.56<br>(4,200,961.03)    | 262,397.30<br>(675,871.04)     | 932.41<br>(56,157.77)      | 2958.61<br>(345,293.64)      | 32,236.60<br>(170,775.72)  |
| Bengkulu                                 | 1,961,059.86  | 162,867.86<br>(444,476.78)     | 121,457.69<br>(1,516,583.08)    | 0<br>(0)                       | 60,641.22<br>(64,766.07)   | 38,619.88<br>(120,474.92)    | 576.70<br>(22,332.69)      |
| South Sumatra                            | 8,719,635.93  | 183,095.38<br>(720,836.33)     | 1,106,098.45<br>(7,998,799.60)  | 574,842.08<br>(1,300,093.86)   | 0<br>(0)                   | 48,534.23<br>(364,617.07)    | 1750.23<br>(76,430.07)     |
| Lampung                                  | 3,369,982.92  | 389,621.31<br>(417,179.79)     | 1,044,705.98<br>(2,952,803.13)  | 14,227.43<br>(124,050.04)      | 0<br>(0)                   | 29,822.40<br>(99,059.39)     | 82,359.10<br>(94,224.04)   |
| Total                                    | 40,825,292.85 | 1,005,244.00<br>(4,216,833.49) | 4,770,106.40<br>(36,608,459.38) | 1,494,284.30<br>(4,213,319.00) | 171,248.90<br>(616,309.17) | 194,912.54<br>(3,700,037.83) | 179,245.64<br>(806,479.00) |
| <b><i>Pongo abelii</i></b>               |               |                                |                                 |                                |                            |                              |                            |
| Nanggroe Aceh Darussalam                 | 5,688,779.18  | 584,741.79<br>(856,277.48)     | 1,820,374.76<br>(4,832,501.71)  | 90,665.93<br>(213,575.66)      | 67.38<br>(116,781.43)      | 21,531.87<br>(292,826.25)    | 61,671.04<br>(110,772.61)  |
| North Sumatra                            | 7,198,584.10  | 145,031.73<br>(420,777.86)     | 92,437.41<br>(6,777,806.25)     | 0<br>(344,394.95)              | 0<br>(244,101.76)          | 0<br>(268,550.54)            | 3966.61<br>(97,386.25)     |
| Total                                    | 12,887,363.28 | 729,773.52<br>(1,277,055.34)   | 1,912,812.17<br>(11,610,307.96) | 90,665.93<br>(557,970.61)      | 67.38<br>(360,883.19)      | 21,531.87<br>(561,376.79)    | 65,637.65<br>(208,158.86)  |
| <b><i>Panthera tigris sumatrae</i></b>   |               |                                |                                 |                                |                            |                              |                            |
| Nanggroe Aceh Darussalam                 | 5,688,779.18  | 623,408.91<br>(856,277.48)     | 1,217,771.97<br>(4,832,501.71)  | 6507.05<br>(213,575.66)        | 75,654.95<br>(116,781.43)  | 40.31<br>(292,826.25)        | 28,317.24<br>(110,772.61)  |
| North Sumatra                            | 7,198,584.10  | 335,566.99<br>(420,777.86)     | 732,870.50<br>(6,777,806.25)    | 27,473.22<br>(344,394.95)      | 62,578.61<br>(244,101.76)  | 3676.21<br>(268,550.54)      | 9113.32<br>(97,386.25)     |
| West Sumatra                             | 4,180,539.16  | 499,111.79<br>(763,121.77)     | 643,113.66<br>(3,417,417.38)    | 218.59<br>(63,591.09)          | 36,922.51<br>(181,002.25)  | 105.52<br>(208,154.05)       | 61,033.71<br>(205,239.82)  |



|               |               |                                |                                 |                              |                            |                             |                            |
|---------------|---------------|--------------------------------|---------------------------------|------------------------------|----------------------------|-----------------------------|----------------------------|
| Riau          | 8,955,130.82  | 516,684.26<br>(626,126.24)     | 703,037.08<br>(8,329,004.58)    | 294,501.39<br>(1,555,333.45) | 91,239.45<br>(134,502.14)  | 5034.30<br>(2,209,216.02)   | 8848.65<br>(55,311.98)     |
| Jambi         | 4,932,120.04  | 596,043.68<br>(731,159.01)     | 198,064.63<br>(4,200,961.03)    | 7832.60<br>(675,871.04)      | 21,240.61<br>(56,157.77)   | 0<br>(345,293.64)           | 42,487.49<br>(170,775.72)  |
| Bengkulu      | 1,961,059.86  | 402,742.07<br>(444,476.78)     | 394,302.57<br>(1,516,583.08)    | 0<br>(0)                     | 27,935.06<br>(64,766.07)   | 28,820.25<br>(120,474.92)   | 2738.29 (22,332.69)        |
| South Sumatra | 8,719,635.93  | 347,631.86<br>(720,836.33)     | 223,969.97<br>(7,998,799.60)    | 8456.73<br>(1,300,093.86)    | 0<br>(0)                   | 0<br>(364,617.07)           | 12,520.94<br>(76,430.07)   |
| Lampung       | 3,369,982.92  | 355,316.80<br>(417,179.79)     | 215,903.84<br>(2,952,803.13)    | 0<br>(124,050.04)            | 0<br>(0)                   | 911.54<br>(99,059.39)       | 14,066.00<br>(94,224.04)   |
| Total         | 45,005,832.01 | 3,676,506.36<br>(4,979,955.26) | 4,329,034.23<br>(40,025,876.76) | 344,989.58<br>(4,276,910.09) | 315,571.19<br>(797,311.42) | 38,588.13<br>(3,908,191.88) | 179,125.64<br>(832,473.18) |
